# Supplementary material for: Impact of venous thromboembolism on the mortality in patients with cancer: a population-based cohort study
Source: PubMed Central journal article supplement — Lancet Reg Health Eur. 2023 Sep 28;34:100739. doi: 10.1016/j.lanepe.2023.100739 (PMC10558815; doi:10.1016/j.lanepe.2023.100739), 2023-09-28
Supplement: mmc1.pdf [file mmc1.pdf]

# Supplementary Material

## Contents

|                                                                                                                                                                                                                  |           |
|------------------------------------------------------------------------------------------------------------------------------------------------------------------------------------------------------------------|-----------|
| <b>Description of the Danish registries .....</b>                                                                                                                                                                | <b>2</b>  |
| <b>References .....</b>                                                                                                                                                                                          | <b>4</b>  |
| <b><i>Table S1. Diagnosis, medication, and treatment codes used in the study .....</i></b>                                                                                                                       | <b>6</b>  |
| <b><i>Table S2. Mortality risks and mortality rate ratios by calendar period of venous thromboembolism and by follow-up time .....</i></b>                                                                       | <b>8</b>  |
| <b><i>Table S3. Mortality risks and mortality rate ratios for patients with pulmonary embolism and venous thrombosis and their comparison cohorts by follow-up time .....</i></b>                                | <b>9</b>  |
| <b><i>Table S4. Mortality risks and mortality rate ratios by cancer type and by follow-up time .....</i></b>                                                                                                     | <b>11</b> |
| <b><i>Table S5. Mortality risks, rates, and mortality rate ratios for patients with venous thromboembolism and their cancer cohorts after excluding patients with less than one month of follow-up. ....</i></b> | <b>12</b> |
| <b><i>Figure S1. Overall mortality in patients with venous thromboembolism concurrent with a cancer diagnosis and matched comparison cancer cohort, stratified by cancer stage .....</i></b>                     | <b>13</b> |
| <b><i>Figure S2. Overall mortality in patients with venous thromboembolism after a cancer diagnosis and matched comparison cancer cohort, stratified by cancer stage.....</i></b>                                | <b>14</b> |

# **Impact of venous thromboembolism on the mortality in patients with cancer: a population-based cohort study**

Henrik Toft Sørensen, MD, PhD, DMSc, DSc <sup>a,b</sup>, Lars Pedersen, MSc, PhD <sup>a</sup>, Nick van Es, MD, PhD <sup>c,d</sup>, Harry R. Büller, MD, PhD <sup>c,d</sup>, Erzsébet Horváth-Puhó, MSc, PhD <sup>a</sup>

1. Department of Clinical Epidemiology, Aarhus University Hospital and Aarhus University, Aarhus, Denmark
2. Clinical Excellence Research Center, Stanford University, Stanford, California, USA
3. Amsterdam UMC location University of Amsterdam, Department of Vascular Medicine, Amsterdam, the Netherlands
4. Amsterdam Cardiovascular Sciences, Pulmonary Hypertension & Thrombosis, Amsterdam, the Netherlands

## **Description of the Danish registries**

The present study was based on routinely collected nationwide Danish registry data. Denmark has a state-funded healthcare system ensuring free access to healthcare for all residents.<sup>1</sup> We used the following data sources:

- The Danish National Patient Registry contains complete nationwide information on hospital inpatient admissions since 1977 and hospital outpatient clinic and emergency contacts since 1995.<sup>2</sup> Each hospital discharge or outpatient visit is recorded with one primary diagnosis and one or more secondary diagnoses coded according to the *International Classification of Diseases, Eighth Revision* between 1977 and 1993 and *Tenth Revision* thereafter. We used the Patient Registry to identify the patients with venous thromboembolism and comorbidities included in Table 1.
- The Danish Cancer Registry has recorded all incident cases of malignant neoplasms in Denmark since 1943 (mandatory since 1987), including information on morphology, histology, and cancer stage at time of diagnosis.<sup>3</sup> Diagnoses in the Cancer Registry generally have high validity, with 95%–98% completeness and accuracy of recorded diagnoses. For example, it has been shown that only 3·6% of lung cancers and 1·2% of breast cancers have a missing or incorrect diagnosis code. Cancer cases are coded according to the *International Classification of Diseases, Tenth Revision*. We used this Registry to

identify all incident cancers recorded concurrent or before a venous thromboembolism diagnosis. We considered all cancers, as well as site-specific cancers, grouped according to the annual cancer report published by the Danish Health Data Authority.

- The Danish Civil Registration System, established in 1968, is updated daily with changes in vital status and migration for the entire Danish population.<sup>4</sup> A unique 10-digit personal identifier is assigned to all residents at birth or upon immigration, which enables accurate and unambiguous linkage across all data sources at the individual level.
- The Danish National Prescription Registry has recorded detailed data on all prescription drugs sold in Danish pharmacies since 1995. The Registry contains variables that characterize each redeemed prescription, including those describing the patient, the drug dispensed, the health provider issuing the prescription and the dispensing pharmacy. Prescription drugs are coded using the Anatomical Therapeutic Chemical (ATC) coding system.

## References

1. Schmidt M, Schmidt SAJ, Adelborg K, et al. The Danish health care system and epidemiological research: from health care contacts to database records. *Clin Epidemiol.* 2019;**11**:56391.
2. Schmidt M, Schmidt SAJ, Sandegaard JL, Ehrenstein V, Pedersen L, Sørensen HT. The Danish National Patient Registry: a review of content, data quality, and research potential. *Clin Epidemiol.* 2015;**7**:44990.
3. Gjerstorff ML. The Danish Cancer Registry. *Scand J Public Health.* 2011;**39**(7 Suppl):425.
4. Schmidt M, Pedersen L, Sørensen HT. The Danish Civil Registration System as a tool in epidemiology. *Eur J Epidemiol.* 2014;**29**:5419.

|                               | <b>Coding</b> | <b>Inclusion codes</b>                                                                                                 | <b>Exclusion codes</b> |
|-------------------------------|---------------|------------------------------------------------------------------------------------------------------------------------|------------------------|
| Exposure                      |               |                                                                                                                        |                        |
| Venous thromboembolism        |               |                                                                                                                        |                        |
| Pulmonary embolism            | ICD-8         | 450.99                                                                                                                 |                        |
|                               | ICD-10        | I26                                                                                                                    |                        |
| Deep vein thrombosis          | ICD-8         | 451.00                                                                                                                 |                        |
|                               | ICD-10        | I80.1, I80.2, I80.3                                                                                                    |                        |
| Covariates                    |               |                                                                                                                        |                        |
| Antihypertensives             |               |                                                                                                                        |                        |
| ACE inhibitors                | ATC           | C09A, C09B                                                                                                             |                        |
| Angiotensin receptor blockers | ATC           | C09C, C09D                                                                                                             |                        |
| Calcium channel blockers      | ATC           | C07FB, C08CA, C09BB,<br>C09DB, C09DX01                                                                                 |                        |
| Thiazides/diuretics           | ATC           | C03AA01, C03AA03,<br>C03AB01, C03AB03,<br>C03AX01, C03EA, C07B,<br>C09BA, C09DA, C09DX01,<br>C09DX03, C09XA52, C09XA54 | C07BA06<br>C09BA04     |
| Beta-blockers                 | ATC           | C07                                                                                                                    |                        |
| Other antihypertensives       | ATC           | C02AC, C02CA, C03BA11,<br>C09XA C02AB01                                                                                | C09XA54                |
| Vitamin K antagonists         | ATC           | B01AA                                                                                                                  |                        |
| Direct oral anticoagulants    | ATC           | B01AE07, B01AF01, B01AX06,<br>B01AF02, B01AF03                                                                         |                        |

|                              |           |                           |
|------------------------------|-----------|---------------------------|
| Low-molecular-weight heparin | ATC       | B01AB                     |
| Statins                      | ATC       | C10AA, C10B               |
| Aspirin                      | ATC       | B01AC06, N02BA01, N02BA51 |
| Opioid use                   | ATC       | N02A, N07BC02             |
| Glucocorticoids              | ATC       | H02AB                     |
| Loop diuretics               | ATC       | C03C                      |
| Surgical procedures          | Surgery   | KA-KQ, KX, KY             |
| Central venous catheter      | Procedure | BMBD00, BMBD01, BMBZ51    |

---

**Table S1. Diagnosis, medication, and treatment codes used in the study**

|                  | Venous thromboembolism concurrent with a cancer diagnosis |                     |                    | Venous thromboembolism after a cancer diagnosis |                   |                   |
|------------------|-----------------------------------------------------------|---------------------|--------------------|-------------------------------------------------|-------------------|-------------------|
|                  | VTE cohort                                                | Comparison cohort   | Mortality rate     | VTE cohort                                      | Comparison cohort | Mortality rate    |
| Calendar         | mortality risk                                            | mortality risk      | ratio              | mortality risk                                  | mortality risk    | ratio             |
| period           | (95% CI)                                                  | (95% CI)            | (95% CI)           | (95% CI)                                        | (95% CI)          | (95% CI)          |
| <b>1995-1999</b> | <b>N = 316</b>                                            | <b>N = 930</b>      |                    | <b>N = 1814</b>                                 | <b>N = 5414</b>   |                   |
| 0-1 month        | 40.5 (35.3–46.1)                                          | 9.0 (7.4–11.1)      | 10.53 (6.87–16.14) | 18.5 (16.8–20.4)                                | 2.4 (2.0–2.8)     | 8.21 (6.41–10.52) |
| 0-3 months       | 57.6 (52.2–63.1)                                          | 19.7 (17.3–22.4)    | 6.80 (5.06–9.14)   | 29.4 (27.3–31.5)                                | 6.0 (5.4–6.7)     | 5.88 (4.96–6.98)  |
| 0-1 year         | 72.2 (67.1–77.0)                                          | 40.1 (37.0–43.3)    | 5.42 (4.25–6.90)   | 49.8 (47.5–52.1)                                | 18.2 (17.2–19.3)  | 3.88 (3.45–4.35)  |
| 0-5 years        | 85.4 (81.3–89.1)                                          | 68.9 (65.9–71.9)    | 4.02 (3.27–4.93)   | 72.0 (69.9–74.0)                                | 46.8 (45.4–48.1)  | 2.63 (2.41–2.87)  |
| <b>2000-2004</b> | <b>N = 417</b>                                            | <b>N = 1223</b>     |                    | <b>N = 2856</b>                                 | <b>N = 8505</b>   |                   |
| 0-1 month        | 32.1 (27.9–36.9)                                          | 7.9 (6.5–9.5)       | 7.01 (4.87–10.10)  | 16.4 (15.1–17.8)                                | 2.5 (2.1–2.9)     | 6.79 (5.60–8.24)  |
| 0-3 months       | 52.0 (47.3–56.9)                                          | 18.07 (16.03–20.34) | 6.73 (5.13–8.83)   | 27.9 (26.3–29.6)                                | 6.4 (5.9–6.9)     | 5.10 (4.46–5.84)  |
| 0-1 year         | 68.8 (64.4–73.2)                                          | 38.76 (36.09–41.55) | 4.82 (3.90–5.96)   | 49.3 (47.5–51.1)                                | 18.5 (17.7–19.4)  | 3.86 (3.52–4.24)  |
| 0-5 years        | 84.9 (81.3–88.1)                                          | 67.47 (64.83–70.08) | 3.55 (2.98–4.24)   | 72.1 (70.4–73.7)                                | 46.7 (45.7–47.8)  | 2.59 (2.42–2.78)  |
| <b>2005-2009</b> | <b>N = 359</b>                                            | <b>N = 1067</b>     |                    | <b>N = 4611</b>                                 | <b>N = 13 766</b> |                   |
| 0-1 month        | 25.6 (21.2–30.2)                                          | 8.53 (7.00–10.37)   | 6.14 (3.98–9.47)   | 15.1 (14.1–16.2)                                | 2.5 (2.2–2.8)     | 6.05 (5.20–7.04)  |
| 0-3 months       | 51.0 (45.9–56.2)                                          | 17.90 (15.73–20.34) | 5.26 (3.97–6.97)   | 27.7 (26.4–29.0)                                | 6.7 (6.2–7.1)     | 4.54 (4.10–5.04)  |
| 0-1 year         | 71.3 (66.6–75.9)                                          | 41.33 (38.44–44.35) | 4.12 (3.32–5.11)   | 46.6 (45.2–48.1)                                | 18.9 (18.2–19.5)  | 3.25 (3.03–3.50)  |

|                  |                  |                     |                   |                   |                   |                  |
|------------------|------------------|---------------------|-------------------|-------------------|-------------------|------------------|
| 0-5 years        | 83.8 (79.9–87.4) | 67.70 (64.88–70.49) | 3.32 (2.75–4.00)  | 70.4 (69.1–71.8)  | 44.4 (43.6–45.3)  | 2.47 (2.34–2.61) |
| <b>2010-2014</b> | <b>N = 464</b>   | <b>N = 1362</b>     |                   | <b>N = 7106</b>   | <b>N = 21 217</b> |                  |
| 0-1 month        | 20.7 (17.3–24.7) | 6.90 (5.67–8.38)    | 5.55 (3.68–8.36)  | 12.7 (12.0–13.5)  | 2.1 (2.0–2.3)     | 5.81 (5.07–6.67) |
| 0-3 months       | 41.6 (37.7–46.2) | 14.76 (12.98–16.75) | 5.00 (3.83–6.53)  | 24.5 (23.5–25.5)  | 5.6 (5.3–5.9)     | 4.64 (4.24–5.08) |
| 0-1 year         | 67.5 (63.2–71.7) | 35.54 (33.06–38.14) | 4.26 (3.48–5.20)  | 43.70 (42.6–44.9) | 16.4 (15.9–16.9)  | 3.46 (3.26–3.68) |
| 0-5 years        | 84.5 (81.0–87.6) | 63.66 (61.10–66.21) | 3.39 (2.86–4.02)  | 68.1 (67.1–69.2)  | 40.4 (39.8–41.1)  | 2.61 (2.49–2.73) |
| <b>2015-2018</b> | <b>N = 326</b>   | <b>N = 967</b>      |                   | <b>N = 6979</b>   | <b>N = 20 833</b> |                  |
| 0-1 month        | 22.1 (18.0–27.0) | 5.48 (4.21–7.11)    | 9.95 (5.63–17.58) | 11.6 (10.8–12.3)  | 1.8 (1.6–2.0)     | 5.82 (5.02–6.76) |
| 0-3 months       | 43.6 (38.4–49.1) | 15.00 (12.90–17.41) | 8.17 (5.68–11.77) | 22.7 (21.8–23.7)  | 5.0 (4.7–5.3)     | 4.55 (4.13–5.01) |
| 0-1 year         | 61.4 (56.1–66.6) | 37.57 (34.60–40.70) | 3.91 (3.08–4.96)  | 41.5 (40.4–42.7)  | 14.8 (14.3–15.3)  | 3.43 (3.21–3.65) |
| 0-5 years        | 81.3 (76.6–85.5) | 65.97 (62.58–69.34) | 3.26 (2.66–3.99)  | 65.6 (64.2–66.9)  | 39.5 (38.7–40.3)  | 2.55 (2.43–2.68) |

**Table S2. Mortality risks and mortality rate ratios by calendar period of venous thromboembolism and by follow-up time**



|                               | Venous thromboembolism concurrent with a cancer diagnosis |                   |                   | Venous thromboembolism after a cancer diagnosis |                   |                  |
|-------------------------------|-----------------------------------------------------------|-------------------|-------------------|-------------------------------------------------|-------------------|------------------|
|                               | VTE cohort                                                | Comparison cohort | Mortality rate    | VTE cohort                                      | Comparison cohort | Mortality rate   |
|                               | mortality risk                                            | mortality risk    | ratio             | mortality risk                                  | mortality risk    | ratio            |
|                               | (95% CI)                                                  | (95% CI)          | (95% CI)          | (95% CI)                                        | (95% CI)          | (95% CI)         |
| <b>Pulmonary embolism</b>     |                                                           |                   |                   |                                                 |                   |                  |
| 0-1 month                     | 36.5 (33.8–39.4)                                          | 7.6 (6.7–8.5)     | 9.19 (7.37–11.46) | 18.6 (17.9–19.3)                                | 2.2 (2.1–2.4)     | 8.58 (7.80–9.44) |
| 0-3 months                    | 56.1 (53.3–59.0)                                          | 17.0 (15.8–18.3)  | 7.62 (6.48–8.97)  | 30.3 (29.5–31.1)                                | 5.9 (5.7–6.2)     | 5.94 (5.56–6.34) |
| 0-1 year                      | 73.0 (70.4–75.6)                                          | 39.3 (37.6–41.0)  | 5.10 (4.51–5.78)  | 49.3 (48.4–50.2)                                | 17.3 (17.0–17.7)  | 4.00 (3.82–4.18) |
| 0-5 years                     | 87.1 (85.1–89.0)                                          | 67.5 (65.9–69.2)  | 4.05 (3.64–4.51)  | 72.8 (72.0–73.7)                                | 43.3 (42.8–43.8)  | 2.92 (2.82–3.02) |
| <b>Deep venous thrombosis</b> |                                                           |                   |                   |                                                 |                   |                  |
| 0-1 month                     | 14.3 (12.0–17.1)                                          | 7.5 (6.5–8.7)     | 2.96 (2.18–4.03)  | 8.2 (7.7–8.8)                                   | 2.1 (2.0–2.3)     | 3.35 (2.98–3.76) |
| 0-3 months                    | 37.5 (34.1–41.1)                                          | 16.9 (15.4–18.6)  | 3.89 (3.17–4.77)  | 19.8 (19.0–20.5)                                | 5.5 (5.3–5.8)     | 3.39 (3.15–3.66) |
| 0-1 year                      | 60.9 (57.4–64.4)                                          | 37.3 (35.3–39.3)  | 3.50 (3.00–4.10)  | 39.6 (38.7–40.6)                                | 16.2 (15.8–16.6)  | 2.93 (2.78–3.07) |
| 0-5 years                     | 79.5 (76.6–82.4)                                          | 65.2 (63.2–67.2)  | 2.79 (2.45–3.18)  | 63.7 (62.8–64.7)                                | 41.2 (40.7–41.8)  | 2.21 (2.13–2.30) |

**Table S3. Mortality risks and mortality rate ratios for patients with pulmonary embolism and venous thrombosis and their comparison cohorts by follow-up time**

|                     |           | Venous thromboembolism concurrent with a cancer diagnosis |                  |                    | Venous thromboembolism after a cancer diagnosis |                  |                  |
|---------------------|-----------|-----------------------------------------------------------|------------------|--------------------|-------------------------------------------------|------------------|------------------|
|                     |           | VTE cohort                                                | Comparison       | Mortality rate     | VTE cohort                                      | Comparison       | Mortality rate   |
|                     |           | mortality risk                                            | cohort           | ratio              | mortality risk                                  | cohort           | ratio            |
|                     |           | (95% CI)                                                  | mortality risk   | (95% CI)           | (95% CI)                                        | mortality risk   | (95% CI)         |
|                     |           |                                                           | (95% CI)         |                    |                                                 | (95% CI)         |                  |
| Stomach             | 0-1 year  | 96.4 (89.1–99.3)                                          | 53.5 (45.9–61.4) | 7.19 (3.89–13.30)  | 64.2 (59.6–68.9)                                | 32.4 (29.8–35.1) | 3.15 (2.56–3.88) |
|                     | 0-5 years | 96.4 (89.1–99.3)                                          | 77.3 (70.4–83.5) | 5.85 (3.34–10.24)  | 81.5 (77.6–85.2)                                | 60.5 (57.7–63.8) | 2.60 (2.17–3.10) |
| Colon               | 0-1 year  | 54.1 (48.3–60.2)                                          | 23.3 (20.5–26.4) | 4.76 (3.54–6.38)   | 42.6 (40.7–44.5)                                | 13.8 (13.1–14.6) | 3.71 (3.33–4.12) |
|                     | 0-5 years | 74.9 (69.6–78.0)                                          | 50.1 (46.8–53.7) | 3.27 (2.60–4.10)   | 67.6 (65.7–69.5)                                | 40.7 (40.0–42.0) | 2.55 (2.36–2.76) |
| Rectal              | 0-1 year  | 51.2 (41.0–62.3)                                          | 23.8 (18.9–29.6) | 4.60 (2.49–8.49)   | 36.8 (34.4–39.4)                                | 13.1 (12.1–14.1) | 3.20 (2.77–3.70) |
|                     | 0-5 years | 68.5 (58.3–78.3)                                          | 49.9 (43.7–56.4) | 3.13 (1.98–4.94)   | 66.3 (63.8–68.8)                                | 39.6 (38.1–41.1) | 2.49 (2.25–2.75) |
| Liver               | 0-1 year  | 87.5 (76.6–94.9)                                          | 46.8 (38.5–56.0) | 5.13 (2.69–9.77)   | 74.8 (66.4–82.4)                                | 47.7 (42.4–53.5) | 2.75 (1.91–3.96) |
|                     | 0-5 years | 100.0                                                     | 82.4 (74.9–88.8) | 5.14 (2.81–9.41)   | 91.9 (85.9–96.0)                                | 82.6 (77.7–87.0) | 2.38 (1.72–3.31) |
| Pancreas            | 0-1 year  | 97.6 (95.2–99.0)                                          | 74.0 (70.8–77.1) | 5.64 (4.38–7.25)   | 88.7 (86.2–90.8)                                | 61.0 (58.8–63.0) | 2.61 (2.29–2.96) |
|                     | 0-5 years | 98.4 (96.3–99.5)                                          | 90.6 (88.3–92.6) | 5.28 (4.14–6.75)   | 96.5 (94.9–97.7)                                | 85.0 (83.4–86.6) | 2.43 (2.15–2.75) |
| Non-small cell lung | 0-1 year  | 84.4 (80.9–87.6)                                          | 54.0 (51.4–56.7) | 3.81 (3.20–4.53)   | 71.5 (69.7–73.3)                                | 39.7 (38.6–40.8) | 2.76 (2.55–2.98) |
|                     | 0-5 years | 97.6 (95.8–98.8)                                          | 82.4 (80.3–84.5) | 3.51 (2.98–4.13)   | 89.7 (88.4–90.9)                                | 70.2 (69.1–71.2) | 2.43 (2.27–2.60) |
| Breast              | 0-1 year  | 44.9 (34.1–57.4)                                          | 7.8 (4.8–12.4)   | 10.28 (3.50–30.22) | 32.0 (30.6–33.4)                                | 6.7 (6.3–7.2)    | 4.66 (4.20–5.18) |

|                               |           |                   |                   |                    |                   |                  |                  |
|-------------------------------|-----------|-------------------|-------------------|--------------------|-------------------|------------------|------------------|
|                               | 0-5 years | 64.3 (53.0–75.5)  | 41.19 (34.6–48.2) | 4.06 (2.35–7.04)   | 57.8 (56.3–59.4)  | 28.1 (27.3–28.9) | 2.61 (2.44–2.79) |
| Ovary                         | 0-1 year  | 54.81 (46.7–63.4) | 27.4 (23.3–32.1)  | 4.67 (3.12–7.01)   | 59.8 (56.4–63.2)  | 16.8 (15.4–18.4) | 4.67 (3.91–5.58) |
|                               | 0-5 years | 81.8 (74.8–87.8)  | 65.0 (60.3–69.8)  | 3.42 (2.50–4.68)   | 82.2 (79.3–84.9)  | 48.3 (46.2–50.4) | 3.13 (2.73–3.59) |
| Prostate                      | 0-1 year  | 29.8 (22.0–39.6)  | 20.51 (16.4–25.4) | 2.92 (1.62–5.26)   | 38.7 (37.0–40.6)  | 10.5 (9.8–11.2)  | 4.05 (3.62–4.53) |
|                               | 0-5 years | 67.4 (58.2–76.4)  | 62.13 (56.7–67.6) | 1.92 (1.34–2.76)   | 66.9 (65.1–68.7)  | 41.1 (41.0–42.2) | 2.59 (2.40–2.80) |
| Kidney                        | 0-1 year  | 55.7 (43.8–68.4)  | 20.00 (14.9–26.6) | 10.28 (4.11–25.71) | 35.9 (32.0–40.2)  | 12.5 (11.0–14.2) | 2.96 (2.29–3.83) |
|                               | 0-5 years | 72.4 (60.8–83.0)  | 50.0 (43.0–57.6)  | 4.10 (2.38–7.07)   | 64.5 (60.2–68.8)  | 38.8 (36.3–41.4) | 2.10 (1.77–2.51) |
| Non-<br>Hodgkin's<br>lymphoma | 0-1 year  | 44.3 (34.2–55.9)  | 12.3 (8.7–17.3)   | 11.37 (4.88–26.51) | 32.1 (29.3–35.0)  | 9.3 (8.3–10.4)   | 3.73 (3.09–4.52) |
|                               | 0-5 years | 63.6 (53.1–74.1)  | 41.8 (35.6–48.5)  | 4.55 (2.75–7.52)   | 56.1 (53.0–59.20) | 30.3 (28.6–32.0) | 2.32 (2.04–2.65) |
| Leukemia                      | 0-1 year  | 54.1 (42.2–66.9)  | 12.6 (8.5–18.3)   | 38.02 (9.23–156.6) | 32.4 (29.0–36.0)  | 10.9 (9.6–12.3)  | 3.31 (2.66–4.13) |
|                               | 0-5 years | 72.7 (61.0–83.2)  | 43.4 (36.5–51.0)  | 6.14 (3.38–11.15)  | 61.1 (57.4–64.9)  | 36.9 (34.8–39.2) | 2.29 (1.97–2.67) |

**Table S4. Mortality risks and mortality rate ratios by cancer type and by follow-up time**

|                        |            | Venous thromboembolism concurrent with a cancer diagnosis |                                               |                               | Venous thromboembolism after a cancer diagnosis |                                               |                               |
|------------------------|------------|-----------------------------------------------------------|-----------------------------------------------|-------------------------------|-------------------------------------------------|-----------------------------------------------|-------------------------------|
| Follow-up time         | Cohort     | Mortality risk (95% CI)                                   | Mortality rate per 1000 person-years (95% CI) | Mortality rate ratio (95% CI) | Mortality risk (95% CI)                         | Mortality rate per 1000 person-years (95% CI) | Mortality rate ratio (95% CI) |
| <b>1-3 months</b>      | Comparison | 10.2 (9.4–11.1)                                           | 662 (605-718)                                 |                               | 3.7 (3.5–3.8)                                   | 229 (220-238)                                 |                               |
|                        | VTE        | 29.1 (26.8–31.6)                                          | 2196 (1980-2413)                              | 5.56 (4.61–6.70)              | 13.5 (13.0–14.0)                                | 896 (863-930)                                 | 3.72 (3.48–3.98)              |
| <b>1 month-1 year</b>  | Comparison | 33.5 (32.2–34.8)                                          | 459 (437-481)                                 |                               | 15.0 (14.7–15.2)                                | 178 (175-182)                                 |                               |
|                        | VTE        | 56.1 (53.4–58.7)                                          | 1030 (957-1104)                               | 3.63 (3.22–4.09)              | 36.0 (35.3–36.7)                                | 513 (501-525)                                 | 2.93 (2.82–3.04)              |
| <b>1 month-5 years</b> | Comparison | 63.9 (62.5–65.2)                                          | 247 (238-255)                                 |                               | 41.1 (40.7–41.4)                                | 115 (113-116)                                 |                               |
|                        | VTE        | 78.0 (75.8–80.2)                                          | 469 (441-497)                                 | 2.80 (2.54–3.08)              | 63.6 (62.9–64.2)                                | 254 (249-258)                                 | 2.22 (2.16–2.28)              |

**Table S5. Mortality risks, rates, and mortality rate ratios for patients with venous thromboembolism and their cancer cohorts after excluding patients with less than one month of follow-up.**

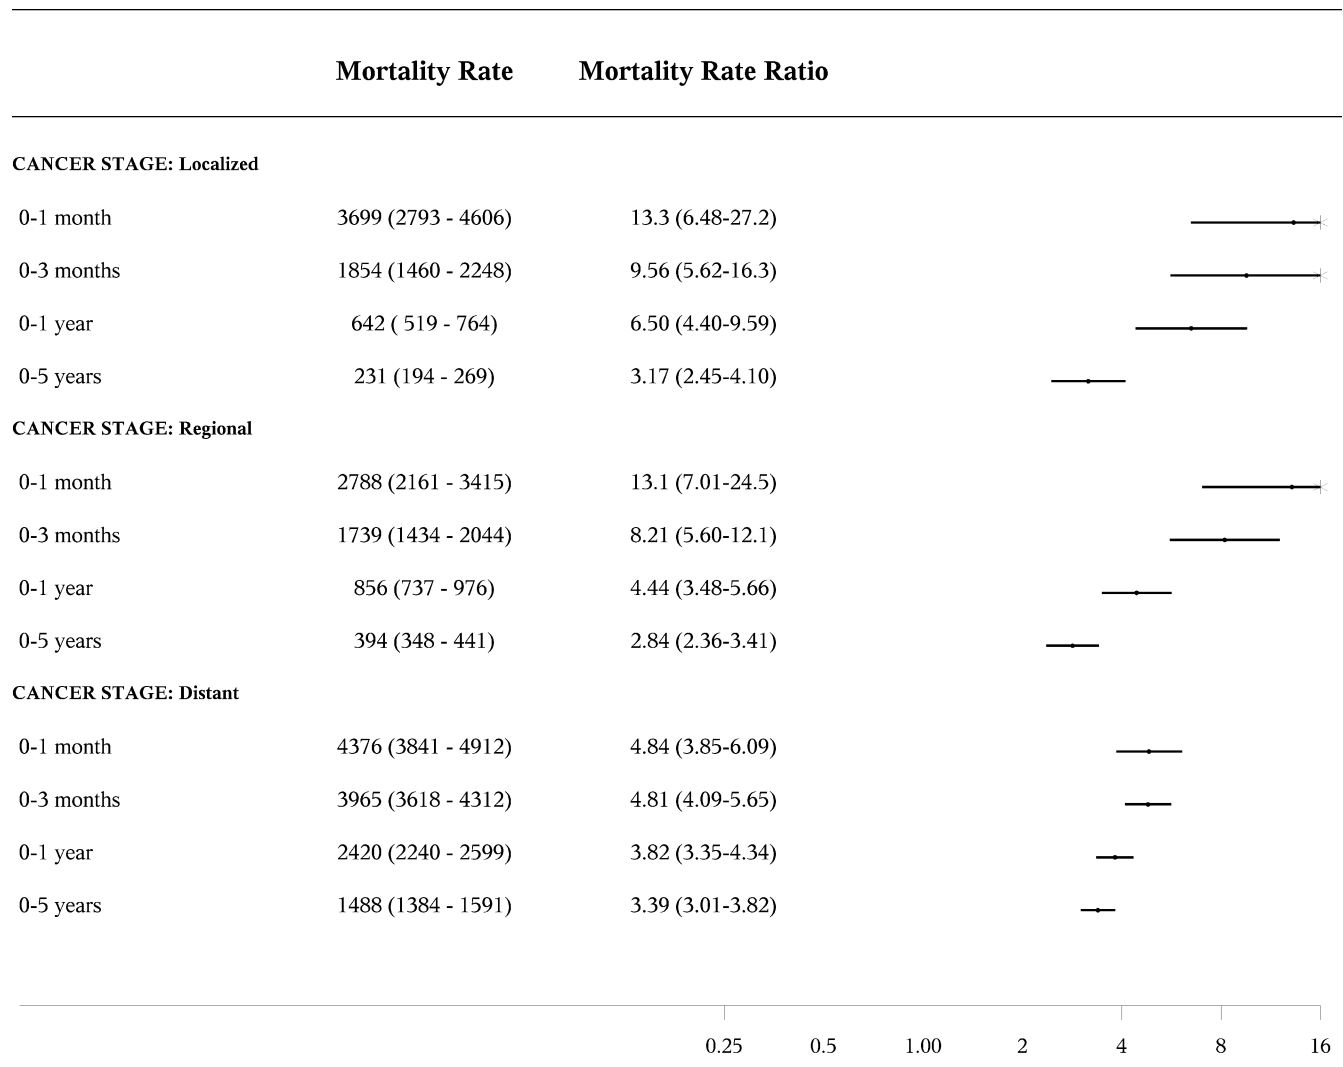

Mortality rates calculated per 1,000 person-years.

**Figure S1. Overall mortality in patients with venous thromboembolism concurrent with a cancer diagnosis and matched comparison cancer cohort, stratified by cancer stage**

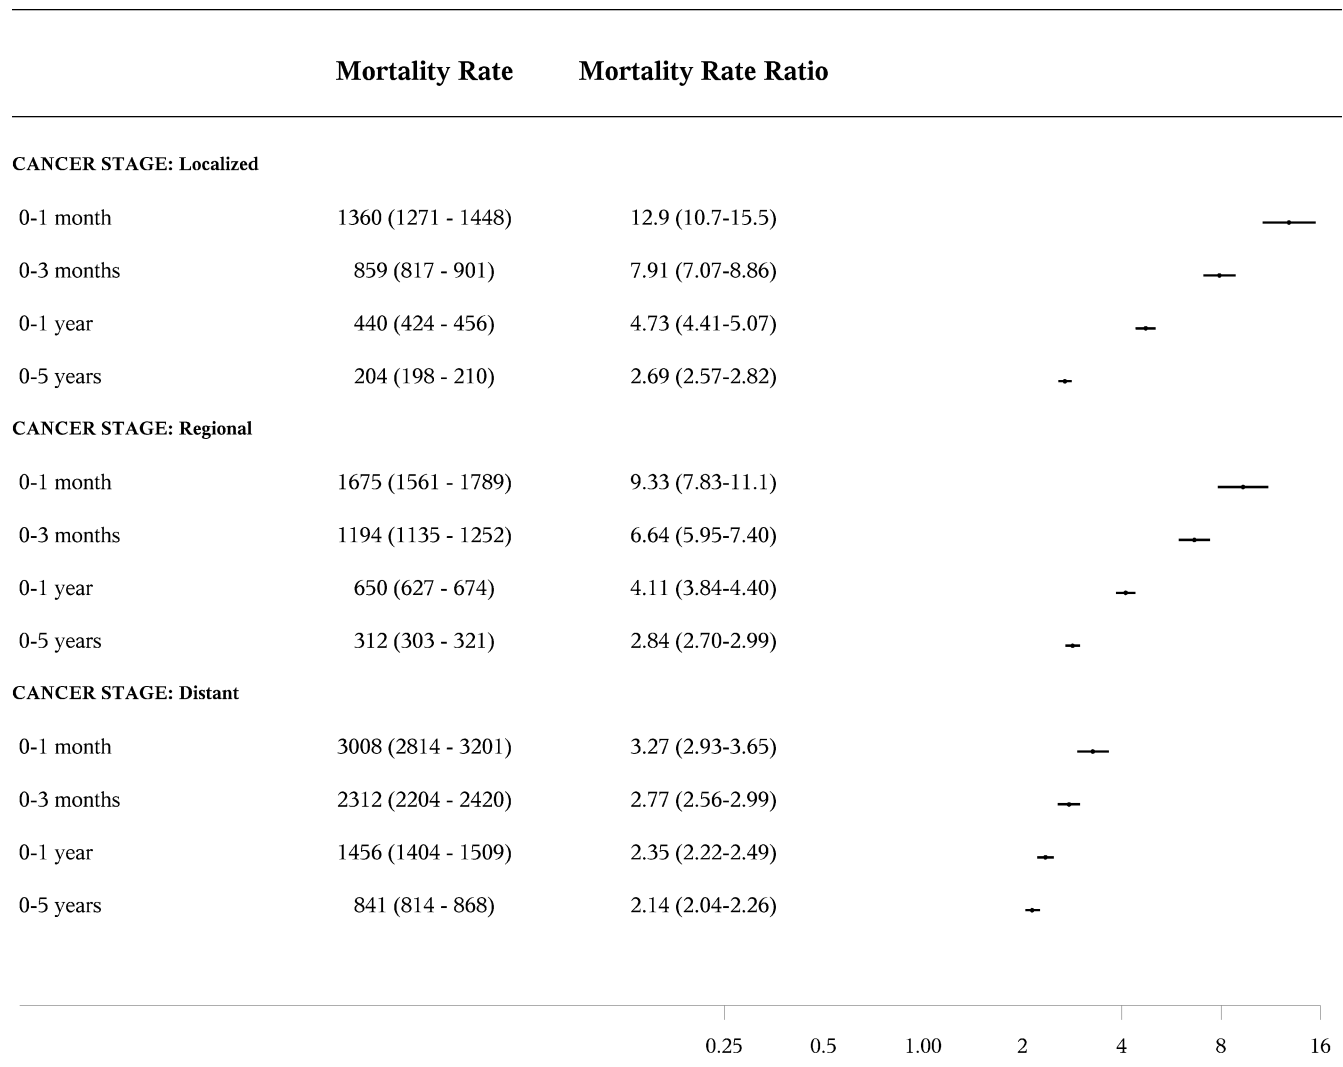

Mortality rates calculated per 1,000 person-years.

**Figure S2. Overall mortality in patients with venous thromboembolism after a cancer diagnosis and matched comparison cancer cohort, stratified by cancer stage**
